# Supplementary material
Source: MDPI journal article supplement (https://www.mdpi.com/2073-4344/12/10/1213)
Supplement: s1 [file s1]

# CYP153A71 from *Alcanivorax dieselolei*: oxidation beyond monoterminal hydroxylation of *n*-alkanes

Cheri Louise Jacobs <sup>1,2</sup>, Rodolpho do Aido-Machado <sup>1</sup>, Carmien Tolmie <sup>1</sup>, Martha Sophia Smit <sup>1,2</sup> and Diederik Johannes Opperman <sup>1,2 \*</sup>

<sup>1</sup> Department of Microbiology and Biochemistry, University of the Free State, Bloemfontein 9300, South Africa

<sup>2</sup> South African DST-NRF Centre of Excellence in Catalysis, c\*change, University of Cape Town, Cape Town 7700, South Africa

\* Correspondence: opperdj@ufs.ac.za; Tel.: +27-51-401-2714

## Supporting Information

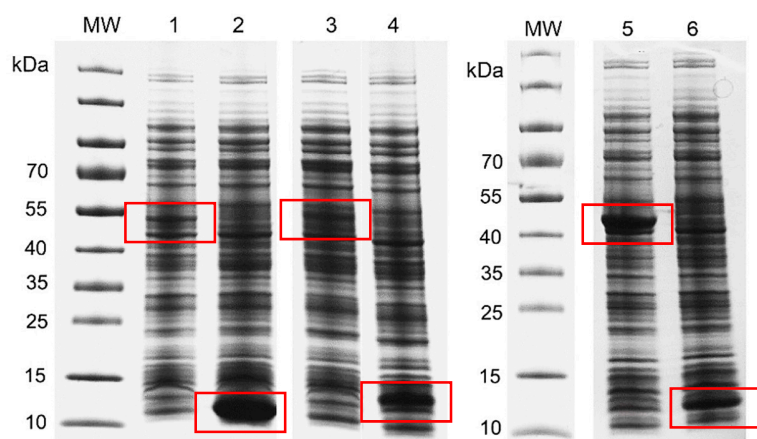

**Figure S1.** SDS-PAGE analysis of redox partner proteins of CYP153A6 and CYP153A13. *E. coli* CFE of lane 1: FdR-A6 (pET-22b(+)), lane 2: Fdx-A6 (pET-22b(+)), lane 3: FdR-A6 (pET-28b(+)), lane 4: Fdx-A6 (pET-28b(+)), lane 5: FdR-A13 (pETDuet-1), lane 6: Fdx-A13 (pETDuet-1). MW: PageRuler Prestained protein ladder.

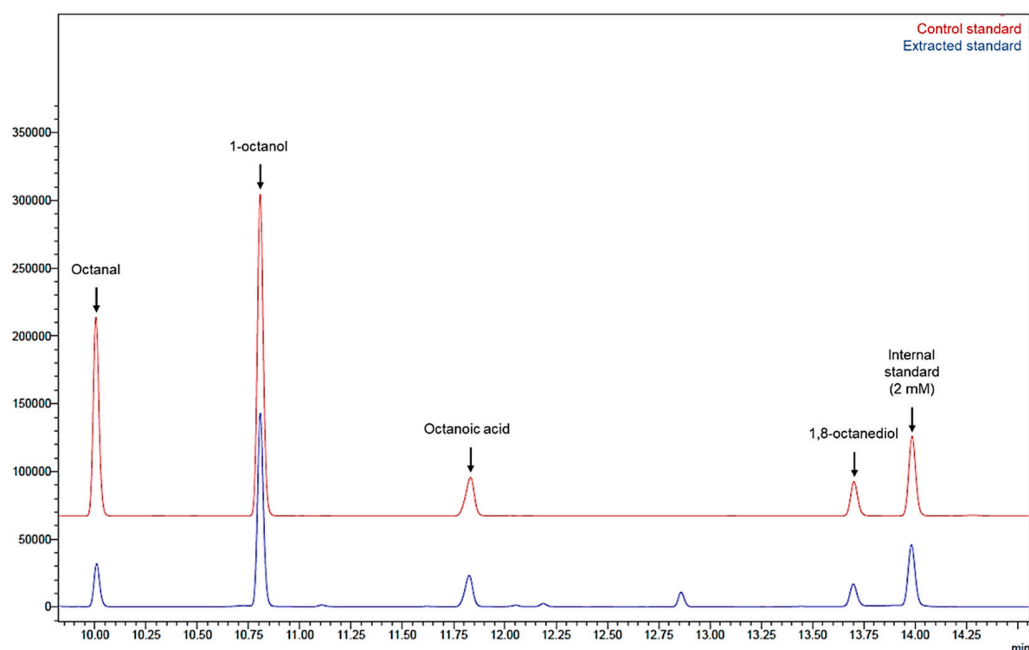

**Figure S2.** Comparative GC-FID chromatograms showing the extraction efficiency of hydroxylated products obtained from *n*-octane. For the control standard, products were directly prepared to final concentration in ethyl acetate containing internal standard. For the extracted standard, products were made up to final concentration in 1 mL reaction buffer [200 mM Tris (pH 8) containing 100 mM glucose and glycerol] in a 40 mL amber vial and extracted using ethyl acetate containing internal standard (equivalent to biotransformation extractions). Expected final product concentrations for both chromatograms: 1-octanol (7.5 mM), octanal (7.5 mM), octanoic acid (1.5 mM), 1,8-octanediol (1.5 mM) and internal standard (2 mM).

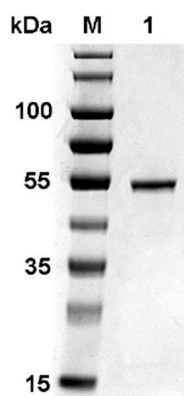

**Figure S3.** SDS-PAGE analysis of purified CYP153A71. M: PageRuler Prestained Protein Ladder, 1: purified CYP153A71 (53.8 kDa).

**Table S1.** Data collection and refinement statistics for CYP153A71.

| <b>Data collection</b>                                      |                                    |
|-------------------------------------------------------------|------------------------------------|
| X-ray source                                                | Beamline i03, Diamond Light Source |
| Wavelength (Å)                                              | 0.9763                             |
| Resolution (Å)                                              | 46.11 – 1.95 (2.00 – 1.95)         |
| Space group                                                 | $P2_1$                             |
| Unit cell parameters                                        |                                    |
| a/b/c (Å)                                                   | 57.66 / 76.82 / 107.34             |
| $\alpha/\beta/\gamma$ (°)                                   | 90.00 / 90.53 / 90.00              |
| Unique reflections                                          | 66934 (4466)                       |
| Completeness                                                | 97.8 (97.0)                        |
| $R_{merge}$                                                 | 0.129 (1.365)                      |
| Average $I/\sigma(I)$                                       | 7.2 (1.2)                          |
| Multiplicity                                                | 3.4 (3.5)                          |
| CC (1/2)                                                    | 0.995 (0.519)                      |
| <b>Refinement</b>                                           |                                    |
| $R_{work}/R_{free}$                                         | 0.2290 / 0.2707                    |
| Molecules in ASU                                            | 2                                  |
| Average B factor (Å) :                                      |                                    |
| Protein                                                     | 43.25                              |
| Ligand                                                      | 28.33                              |
| Solvent                                                     | 40.91                              |
| RMSD:                                                       |                                    |
| Bond length (Å)                                             | 0.0040                             |
| Bond angle (°)                                              | 1.2564                             |
| Ramachandran distribution (%)                               |                                    |
| (favoured/allowed/outlier)                                  | 94.91 / 4.48 / 0.61                |
| Molprobity score                                            | 1.6                                |
| (Values for highest resolution shell indicated in brackets) |                                    |

**Table S2.** Targeted genes from *A. dieselolei* B-5 and *A. borkumensis* SK2.

| Gene      | Accession No | Primer sequences <sup>1</sup>                                                                                                | Annealing Temp | Cloning                                  |
|-----------|--------------|------------------------------------------------------------------------------------------------------------------------------|----------------|------------------------------------------|
| CYP153A71 | ACQ99381     | 5'- <u>CAT ATG</u> TCA ACC AAG TCA GGC ACG<br>ATG-3'<br>5'- <u>GTC GAC</u> TCA ATT TTT TGC GGT CAA CTT<br>GAC-3'             | 55°C           | <i>NdeI</i><br><i>SalI</i>               |
| FdR-A71   | AFT70351     | 5'- <u>CAT ATG</u> ACA ACA CTG TTG CAA AAG<br>AAG TAT-3'<br>5'- <u>GTC GAC</u> TTA TGC CAA CGA TTT CAA<br>TTC-3'             | 55°C           | <i>NdeI</i><br><i>SalI</i>               |
| Fdx-A71   | ACZ62813     | 5'- <u>CAT ATG</u> GGT AAG ATT ACG TTC ATT<br>GAG CAT-3'<br>5'- <u>CTC GAG</u> CTA CAT CTG AAA TTC AGG<br>CAA-3'             | 55°C           | <i>NdeI</i><br><i>XhoI</i>               |
| CYP153A13 | CAL15649.1   | 5'- <u>CAT ATG</u> TCA ACG AGT TCA AGT ACA<br>AGT AAT GAC-3'<br>5'- <u>AAG CTT</u> TAT TTT TTA GCC GTC AAC TTA<br>ACC ATC-3' | 57°C           | <i>NdeI</i><br><i>HindIII</i>            |
| FdR-A13   | CAL15651.1   | 5'- <u>CAT ATG</u> GAA AAC GAA AAA CAA GAT<br>GCC ACT G-3'<br>5'- <u>CCT AGG</u> TCA GAT CAA AGA CTT TAA<br>TTC AAC ATC C-3' | 58°C           | <i>NdeI</i><br><i>AvrII</i> <sup>2</sup> |
| Fdx-A13   | CAL15648.1   | 5'- <u>CAT ATG</u> GGA AAA ATC ACC TTT ATT<br>GAG AAT G-3'<br>5'- <u>CCT AGG</u> TTA TTT TTG CCT GGA TGT CAT<br>TAC TTG-3'   | 58°C           | <i>NdeI</i><br><i>AvrII</i>              |

<sup>1</sup> Underlined sequences indicate introduced restriction sites for directional cloning. PCRs were initiated by a denaturation step (95°C, 2 min) followed by 40 cycles of annealing (10 sec) and elongation (70°C, 1 min). A final elongation step (70°C, 4 min) was included to ensure completion of all amplicons.

<sup>2</sup> Cloned to pET28 digested with *NdeI*/*NheI* to create compatible sticky ends.

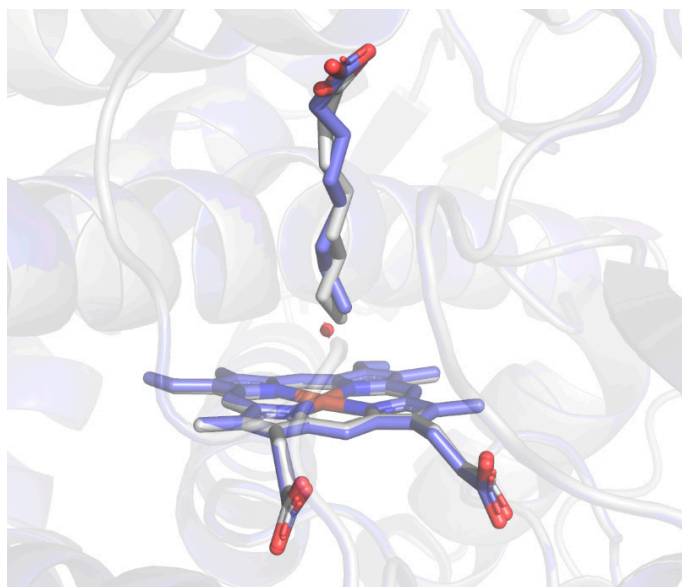

**Figure S4.** Overlay of CYP153A71 chain A (blue) and chain B (gray) showing the two different orientations of octanoic acid.

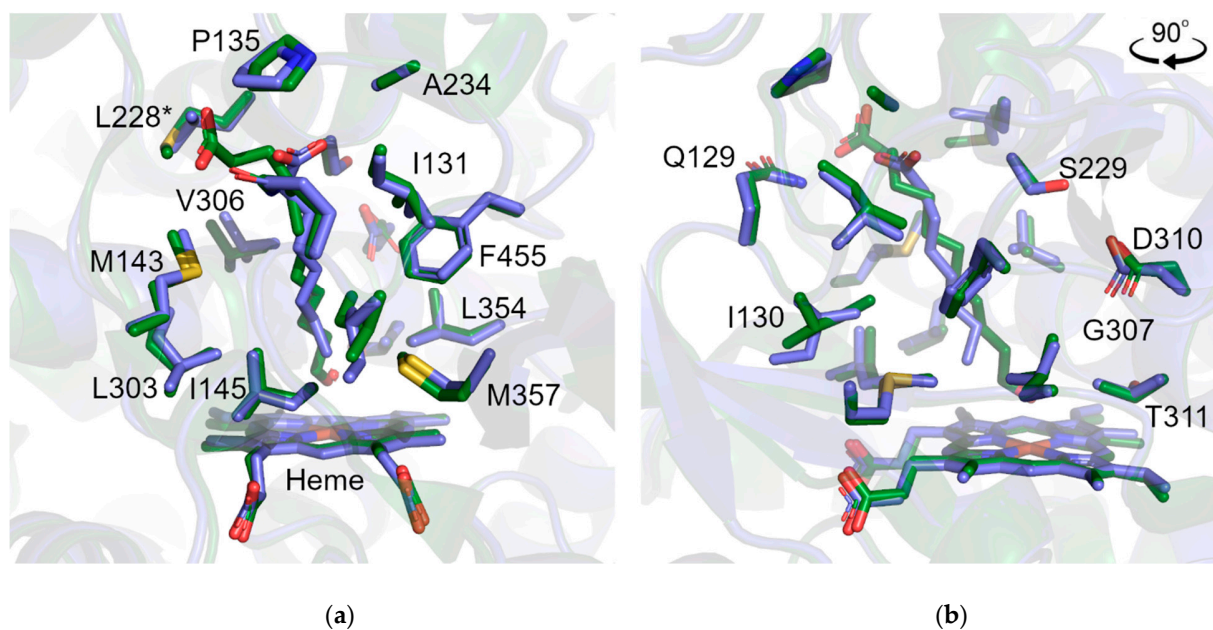

**Figure S5.** (a) Overlay of CYP153A71 chain A (blue) and CYP153A33 (green, 5FYG) showing the amino acids lining the active sites. Numbering is that of CYP153A71 with I130 adopting a different conformation from that observed in CYP153A33. \*L228 from the F-helix is a methionine in CYP153A33. (b) View rotated 90°.

**Table S3.** Percentage amino acid sequence identity between different CYP153A.

|           | CYP153A16 | CYP153A33 | CYP153A13 | CYP153A71 | CYP153A7 | CYP153A6 | CYP153A34 |
|-----------|-----------|-----------|-----------|-----------|----------|----------|-----------|
| CYP153A16 |           | 65.7      | 65.4      | 65.4      | 50       | 48.7     | 49.7      |
| CYP153A33 | 65.7      |           | 81.3      | 81.9      | 47.1     | 48.2     | 48.2      |
| CYP153A13 | 65.4      | 81.3      |           | 83.8      | 47.9     | 47.1     | 47.5      |
| CYP153A71 | 65.4      | 81.9      | 83.8      |           | 48.6     | 49       | 49.7      |
| CYP153A7  | 50        | 47.1      | 47.9      | 48.6      |          | 65.6     | 64.7      |
| CYP153A6  | 48.7      | 48.2      | 47.1      | 49        | 65.6     |          | 76.2      |
| CYP153A34 | 49.7      | 48.2      | 47.5      | 49.7      | 64.7     | 76.2     |           |
